# Supplementary material for: Effect of EZH2 on pulmonary artery smooth muscle cell migration in pulmonary hypertension
Source: PubMed Central journal article supplement — Mol Med Rep. 2020 Dec 10;23(2):129. doi: 10.3892/mmr.2020.11768 (PMC7751464; doi:10.3892/mmr.2020.11768), 2020-12-10
Supplement: Supplementary_Data.pdf [file Supplementary_Data.pdf]

Figure S1. EZH2 expression levels in patients. The mRNA expression levels of EZH2 in all 3 patients were detected via reverse transcription-quantitative PCR. N-PASMC cell line was used as the control. EZH2, enhancer of zeste homolog 2; N-PASMC, normal pulmonary arterial smooth muscle cell.

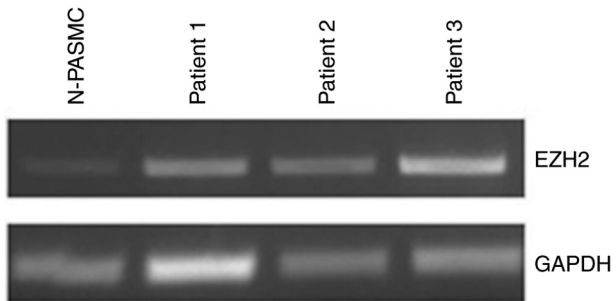

Figure S2. EZH2 gene expression levels following PASMCM transfection. (A) Western blot analysis of EZH2 overexpression. pM-EZH2 vector was transfected into N-PASMCs. pM plasmid was transfected as a control. (B) Western blot analysis of EZH2 knockdown. siRNA targeting EZH2 was transfected into PASMCs from CTEPH patient 3. Scrambled siRNA was used as the RNAi NC (si-NC). The reaction products were subjected to western blot analysis using anti-EZH2 and GAPDH antibodies. EZH2, enhancer of zeste homolog 2; PASMCM, pulmonary arterial smooth muscle cell; N, normal pulmonary arterial smooth muscle cell; si, small interfering; NC, negative control; CTEPH, chronic thromboembolic pulmonary hypertension; RNAi, RNA interference.

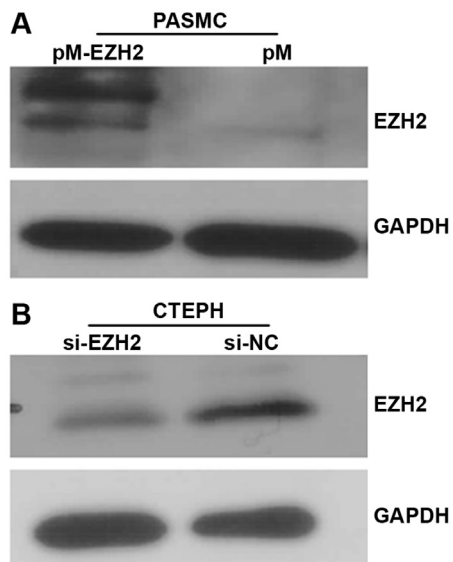

Table SI. Clinical characteristics of patients with CTEPH.

| Characteristics                                       | CTEPH-1 | CTEPH-2 | CTEPH-3 |
|-------------------------------------------------------|---------|---------|---------|
| Age, years                                            | 56      | 61      | 49      |
| Sex                                                   | Male    | Male    | Female  |
| Mean pulmonary arterial pressure, mmHg                | 40      | 60      | 59      |
| Pulmonary vascular resistance, dyn·s cm <sup>-5</sup> | 1,079   | 1,803   | 1,772   |
| WHO functional class                                  | III     | III     | III     |
| 6 min walk distance, m                                | 345     | 429     | 329     |
| Risk factor                                           |         |         |         |
| Previous VTE                                          | No      | No      | No      |
| Recurrent VTE                                         | No      | No      | No      |
| Malignancy                                            | No      | No      | No      |
| Ventriculo-atrial shunt                               | No      | No      | No      |
| Pacemaker                                             | No      | No      | No      |
| Lung cancer                                           | No      | No      | No      |

CTEPH, chronic thromboembolic pulmonary hypertension; VTE, venous thromboembolism.

Table SII. Quantification of relative expression levels.

| Patients      | $2^{-\Delta\Delta C_q}$ value |      |      |
|---------------|-------------------------------|------|------|
|               | Enhancer of zeste homolog 2   | Mean | SD   |
| Control group |                               | 1.00 | 0.05 |
| 1             | 1.04                          |      |      |
| 2             | 1.02                          |      |      |
| 3             | 0.94                          |      |      |
| CTEPH group   |                               | 8.44 | 0.73 |
| CTEPH-1       | 8.61                          |      |      |
| CTEPH-2       | 8.85                          |      |      |
| CTEPH-3       | 7.86                          |      |      |

CTEPH, chronic thromboembolic pulmonary hypertension.

Table SIII. Quantification of relative expression levels.

| A, NADPH oxidase 1        |                              |                       |                       |
|---------------------------|------------------------------|-----------------------|-----------------------|
| Patients                  | $2^{-\Delta\Delta Cq}$ value |                       |                       |
|                           | Total                        | Mean                  | SD                    |
| Control group             |                              | $6.39 \times 10^{-6}$ | $6.46 \times 10^{-6}$ |
| 1                         | $1.15 \times 10^{-5}$        |                       |                       |
| 2                         | $6.91 \times 10^{-6}$        |                       |                       |
| 3                         | $9.59 \times 10^{-7}$        |                       |                       |
| PM-EZH2 group             |                              | $5.29 \times 10^{-6}$ | $2.36 \times 10^{-6}$ |
| PM-EZH2-1                 | $8.27 \times 10^{-6}$        |                       |                       |
| PM-EZH2-2                 | $7.17 \times 10^{-6}$        |                       |                       |
| PM-EZH2-3                 | $3.74 \times 10^{-6}$        |                       |                       |
| B, Superoxide dismutase 3 |                              |                       |                       |
| Patients                  | $2^{-\Delta\Delta Cq}$ value |                       |                       |
|                           | Total                        | Mean                  | SD                    |
| Control group             |                              | $2.05 \times 10^{-4}$ | $9.61 \times 10^{-5}$ |
| 1                         | $2.03 \times 10^{-4}$        |                       |                       |
| 2                         | $2.43 \times 10^{-4}$        |                       |                       |
| 3                         | $1.68 \times 10^{-4}$        |                       |                       |
| PM-EZH2 group             |                              | $3.78 \times 10^{-5}$ | $3.25 \times 10^{-5}$ |
| PM-EZH2-1                 | $1.15 \times 10^{-4}$        |                       |                       |
| PM-EZH2-2                 | $1.15 \times 10^{-4}$        |                       |                       |
| PM-EZH2-3                 | $5.85 \times 10^{-5}$        |                       |                       |
